# Supplementary material for: Conformational Flexibility of D1-Glu189: A Crucial Determinant in Substrate Water Selection, Positioning, and Stabilization within the Oxygen-Evolving Complex of Photosystem II
Source: PubMed Central journal article supplement — ACS Omega. 2024 Dec 5;9(50):50041–8. doi: 10.1021/acsomega.4c09981 (PMC11656237; doi:10.1021/acsomega.4c09981), 2024-12-05
Supplement: ao4c09981_si_001.pdf [file ao4c09981_si_001.pdf]

## Supporting Information for

### **Conformational Flexibility of D1-Glu189: A Crucial Determinant in Substrate Water Selection, Positioning, and Stabilization within the Oxygen-Evolving Complex of Photosystem II**

Hiroshi Isobe,<sup>\*,†</sup> Takayoshi Suzuki,<sup>†</sup> Michihiro Suga,<sup>†</sup>  
Jian-Ren Shen,<sup>†</sup> and Kizashi Yamaguchi<sup>‡</sup>

<sup>†</sup>*Research Institute for Interdisciplinary Science, Okayama  
University, Okayama 700-8530, Japan*

<sup>‡</sup>*Center for Quantum Information and Quantum Biology, Osaka  
University, Toyonaka, Osaka 560-0043, Japan*

E-mail: h-isobe@cc.okayama-u.ac.jp

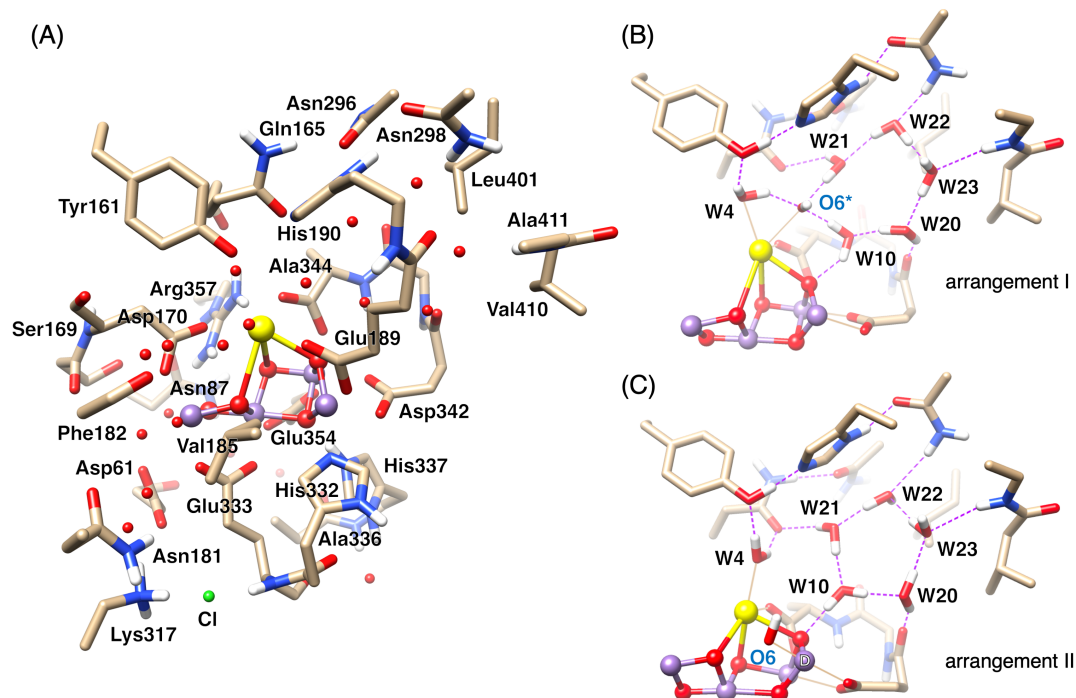

**Figure S1.** (A) An overall view of the OEC model used in this study, with hydrogen atoms bonded to elements other than nitrogen omitted for clarity. (B) Hydrogen-bond network arrangement I, composed of five water molecules W10, W20, W21, W22, and W23, applied to stabilize O6\* (OH<sup>-</sup>) coordinated with the Ca ion. (C) Hydrogen-bond network arrangement II, employed to stabilize O6 coordinated with Mn<sub>D</sub>.

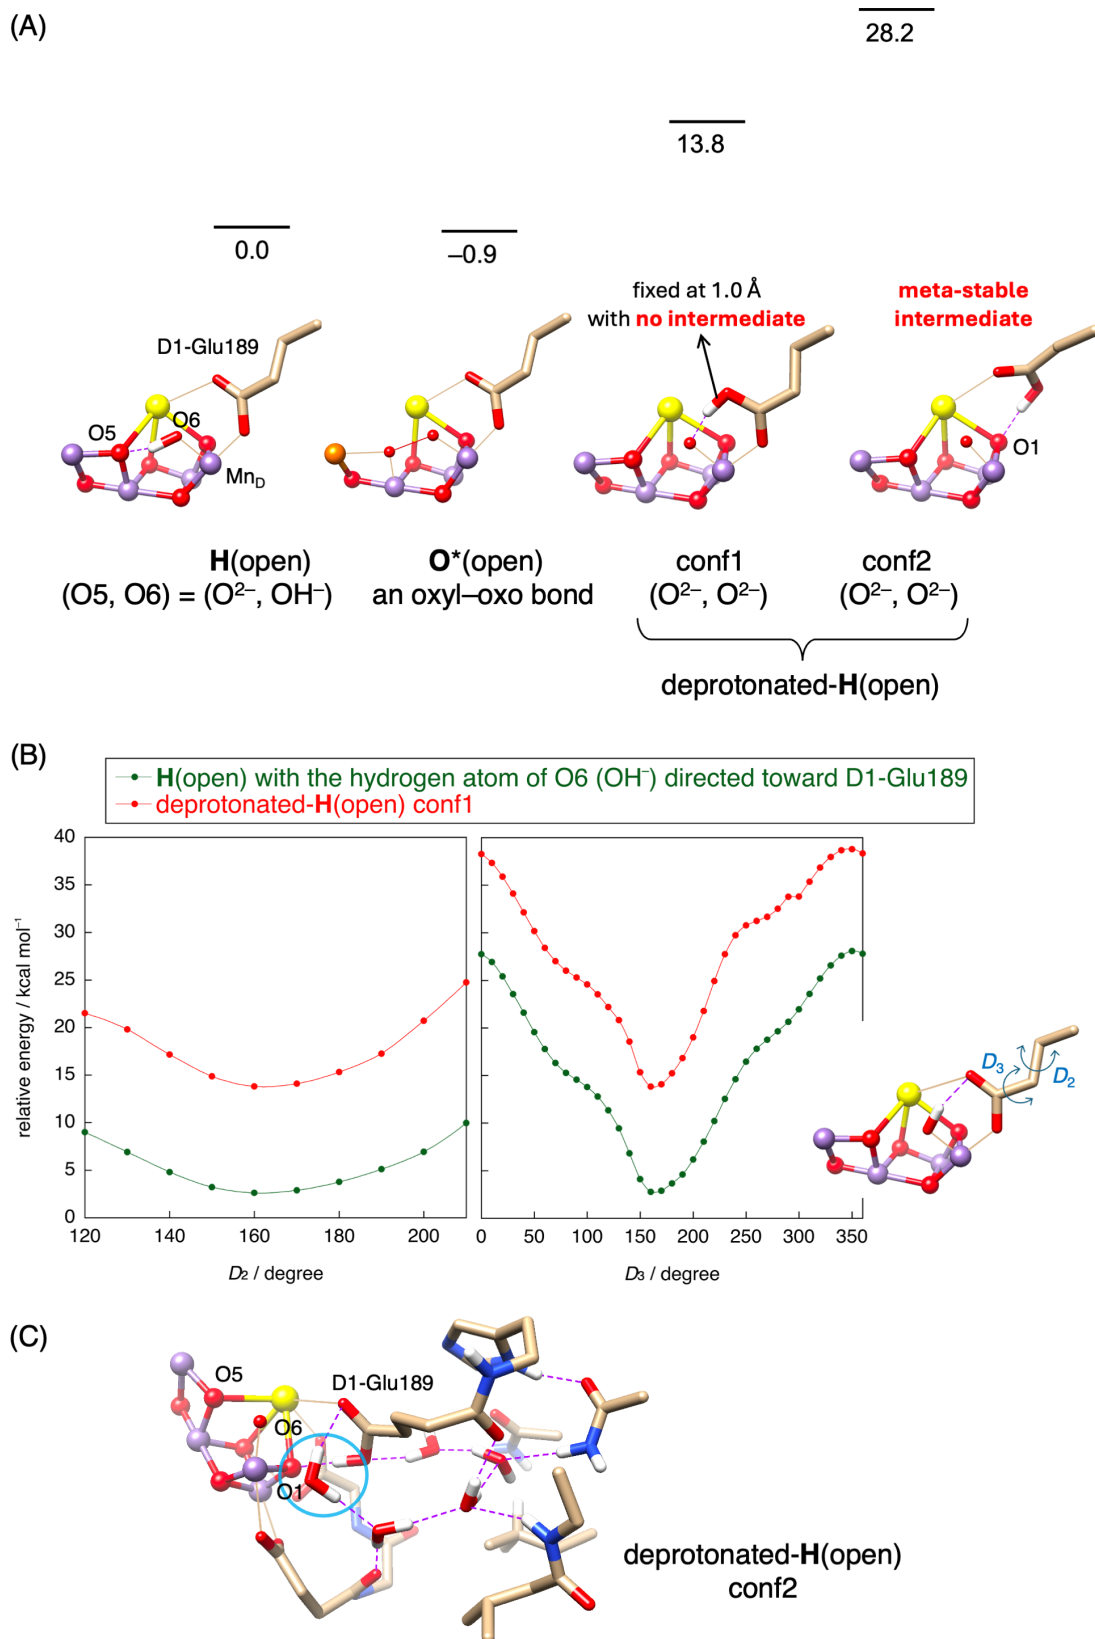

**Figure S2.** (A) Energy profiles of several intermediates in the S<sub>3</sub> state [**H(open)**]: hydroxo-oxo,

**O\***(open): oxyl–oxo, deprotonated-**H**(open): oxo–oxo with D1-Glu189 being protonated], calculated at the IEFPCM-B3LYP\*-D3(BJ)/BS2//B3LYP-D3(BJ)/BS1 level. Relative energies are given in kcal mol<sup>-1</sup> with reference to **H**(open). Protonation states of O5 and O6 are indicated below the labels. (B) Variations in relative energies for **H**(open) and deprotonated-**H**(open) conf1, with the distance between Glu189–O<sup>-</sup> and H<sup>+</sup> fixed at 1.0 Å, plotted as a function of the dihedral angles  $D_2$  and  $D_3$  of D1-Glu189. Relative energies are given in kcal mol<sup>-1</sup> with reference to **H**(open). (C) Graphical representation of deprotonated-**H**(open) conf2, highlighting the local protein environment. The following color codes are used: yellow, calcium; gold, carbon; red, oxygen; blue, nitrogen; white, hydrogen; purple, Mn<sup>IV</sup>; orange, Mn<sup>III</sup>.

Two intermediates on the left side of Figure S2A, **H**(open) and **O\***(open), represent the normal hydroxo-oxo and oxyl-oxo species in the S<sub>3</sub> state, as widely reported in the literature. In **O\***(open), a half-bond forms between O5 and O6, contributing to its stability comparable to **H**(open). On the other hand, two intermediates on the right, deprotonated-**H**(open) conf1 and conf2, are unusual oxo-oxo species rarely discussed in the literature. These states may form when the proton on O6 (OH<sup>-</sup>) of **H**(open) is transferred to the adjacent carboxylate oxygen of D1-Glu189. The conf1 deprotonated-**H**(open) has been reported to be highly unstable [s1,s2]. In response to a reviewer's request for this paper, we carried out geometry optimizations of deprotonated-**H**(open) conf1. This led to a spontaneous proton transfer, accompanied by a stabilization of about 14 kcal mol<sup>-1</sup>, reverting it to the normal hydroxo-oxo species **H**(open). Even when varying the dihedral angles  $D_2$  and  $D_3$  of the D1-Glu189 side chain, the energy difference between **H**(open) and deprotonated-**H**(open) conf1, with the distance between Glu189–O<sup>-</sup> and H<sup>+</sup> fixed at 1.0 Å, remained largely unchanged (Figure S2B). It has been reported that protonated D1-Glu189 can completely detach from Mn<sub>D</sub> and form a hydrogen bond with the O1 bridging oxo of the Mn cluster, resulting in the formation of the metastable deprotonated-**H**(open) conf2 [s3,s4]. This transient state could potentially facilitate proton release through D1-Glu189, prompting us to assess the stability of deprotonated-**H**(open) conf2 as well. Our results indicate that deprotonated-**H**(open) conf2 is even less stable than conf1, by an additional 14.4 kcal mol<sup>-1</sup> (Figure S2A), suggesting that this dihedral adjustment does not sufficiently lower the energy barrier to make the deprotonation process energetically accessible. Moreover, it was found that in conf2, a water molecule enclosed by a cyan circle intrudes between D1-Glu189 and O6 due to spatial limitations (Figure S2C). However, the specific arrangement or movement of this water molecule has not yet been experimentally validated [s5,s6]. Based on these findings, we infer that the protonation of D1-Glu189 [deprotonated-**H**(open) conf1] and the proton

release via D1-Glu189 [deprotonated-H(open) conf2] are unlikely to be linked to vital functions of the OEC.

## References

- [s1] Mandal, M.; Saito, K.; Ishikita, H. The nature of the short oxygen–oxygen distance in the  $\text{Mn}_4\text{CaO}_6$  Complex of photosystem II crystals. *J. Phys. Chem. Lett.* **2020**, *11*, 10262.
- [s2] Malcomson, T.; Rummel, F.; O'Malley, P. Hey ho, where'd the proton go? Final deprotonation of O6 within the  $\text{S}_3$  state of photosystem II. *J. Photochem. Photobiol. B* **2024**, *257*, 112946.
- [s3] Isobe, H.; Shoji, M.; Suzuki, T.; Shen, J.-R.; Yamaguchi, K. Exploring reaction pathways for the structural rearrangements of the Mn cluster induced by water binding in the  $\text{S}_3$  state of the oxygen evolving complex of photosystem II. *J. Photochem. Photobiol. A* **2021**, *405*, 112905.
- [s4] Amin, M.; Kaur, D.; Yang, K. R.; Wang, J.; Mohamed, Z.; Brudvig, G. W.; Gunner, M. R.; Batista, V. Thermodynamics of the  $\text{S}_2$ -to- $\text{S}_3$  state transition of the oxygen-evolving complex of photosystem II. *Phys. Chem. Chem. Phys.* **2019**, *21*, 20840.
- [s5] Li, H.; Nakajima, Y.; Nango, E.; Owada, S.; Yamada, D.; Hashimoto, K.; Luo, F.; Tanaka, R.; Akita, F.; Kato, K.; Kang, J.; Saitoh, Y.; Kishi, S.; Yu, H.; Matsubara, N.; Fujii, H.; Sugahara, M.; Suzuki, M.; Masuda, T.; Kimura, T.; Thao, T. N.; Yonekura, S.; Yu, L.-J.; Tosha, T.; Tono, K.; Joti, Y.; Hatsui, T.; Yabashi, M.; Kubo, M.; Iwata, S.; Isobe, H.; Yamaguchi, K.; Suga, M.; Shen, J.-R. Oxygen-evolving photosystem II structures during  $\text{S}_1$ – $\text{S}_2$ – $\text{S}_3$  transitions. *Nature* **2024**, *626*, 670–677.
- [s6] Hussein, R.; Ibrahim, M.; Bhowmick, A.; Simon, P. S.; Chatterjee, R.; Lassalle, L.; Doyle, M.; Bogacz, I.; Kim, I.-S.; Cheah, M. H.; Gul, S.; de Lichtenberg, C.; Chernev, P.; Pham, C. C.; Young, I. D.; Carbajo, S.; Fuller, F. D.; Alonso-Mori, R.; Batyuk, A.; Sutherlin, K. D.; Brewster, A. S.; Bolotovskiy, R.; Mendez, D.; Holton, J. M.; Moriarty, N. W.; Adams, P. D.; Bergmann, U.; Sauter, N. K.; Dobbek, H.; Messinger, J.; Zouni, A.; Kern, J.; Yachandra, V. K.; Yano, J. Structural dynamics in the water and proton channels of photosystem II during the  $\text{S}_2$  to  $\text{S}_3$  transition. *Nat. Commun.* **2021**, *12*, 6531.

### Cartesian coordinates for two selected structures in Figure 3A

All structures were optimized using the B3LYP-D3(BJ)/BS1 level of theory.

Spherical-harmonic angular functions (keywords 5D and 7F in Gaussian 16) were used.

#### A meta-stable structure with O6\* bound to Ca

B3LYP-D3(BJ)/BS1: -10463.3102026 a.u.

Grimme-D3(BJ): -0.9901947994 a.u.

IEFPCM-B3LYP\*/BS2: -10461.8480680 a.u.

|    |           |            |            |
|----|-----------|------------|------------|
| Ca | 27.704386 | -36.787233 | -59.232782 |
| Mn | 27.394941 | -33.110006 | -57.344588 |
| Mn | 27.293968 | -33.165289 | -60.071933 |
| Mn | 27.306099 | -34.981285 | -62.177044 |
| Mn | 24.828259 | -35.359972 | -61.029409 |
| O  | 26.387037 | -36.259365 | -61.262183 |
| O  | 28.273783 | -34.542755 | -60.739867 |
| O  | 25.966263 | -33.851849 | -61.454489 |
| O  | 28.413516 | -32.527275 | -58.848649 |
| O  | 26.646725 | -34.120832 | -58.677006 |
| O  | 26.317385 | -33.700452 | -56.013329 |
| C  | 32.871579 | -41.754090 | -53.560146 |
| C  | 31.547952 | -41.373172 | -52.881552 |
| C  | 30.415018 | -41.073217 | -53.839618 |
| C  | 29.986896 | -42.023576 | -54.776409 |
| C  | 29.736600 | -39.848603 | -53.795689 |
| C  | 28.922481 | -41.772478 | -55.639309 |
| C  | 28.659999 | -39.582535 | -54.639573 |
| C  | 28.247376 | -40.547430 | -55.563712 |
| O  | 27.217213 | -40.241103 | -56.403409 |
| H  | 31.711344 | -40.498730 | -52.239745 |
| H  | 31.254072 | -42.191051 | -52.207672 |
| H  | 30.487533 | -42.988193 | -54.830027 |
| H  | 30.044876 | -39.086552 | -53.084837 |
| H  | 28.609385 | -42.512551 | -56.368084 |

|   |           |            |            |
|---|-----------|------------|------------|
| H | 28.123728 | -38.640428 | -54.584215 |
| H | 26.955906 | -41.037286 | -57.029257 |
| H | 33.646748 | -41.940369 | -52.807473 |
| H | 33.224835 | -40.953297 | -54.221064 |
| H | 32.769764 | -42.661870 | -54.164945 |
| N | 22.229890 | -43.493093 | -58.589791 |
| C | 22.644839 | -44.870153 | -58.346939 |
| C | 22.140003 | -41.425611 | -59.917139 |
| C | 22.529027 | -42.903785 | -59.745160 |
| O | 23.081119 | -43.510923 | -60.666952 |
| C | 23.812294 | -44.988655 | -57.340295 |
| C | 24.916816 | -44.031299 | -57.637117 |
| C | 25.272014 | -42.861849 | -57.012179 |
| N | 25.740925 | -44.111548 | -58.747483 |
| C | 26.548323 | -43.026167 | -58.761835 |
| N | 26.286285 | -42.246173 | -57.717291 |
| C | 23.371396 | -40.493282 | -59.841006 |
| C | 23.002537 | -39.083862 | -60.315237 |
| C | 23.955878 | -37.964655 | -59.914492 |
| O | 24.783787 | -38.065166 | -58.997712 |
| O | 23.766648 | -36.878659 | -60.600425 |
| H | 24.169510 | -46.025409 | -57.369845 |
| H | 23.454228 | -44.793343 | -56.322462 |
| H | 24.870525 | -42.425791 | -56.107541 |
| H | 27.247971 | -42.799037 | -59.555474 |
| H | 23.744257 | -40.475111 | -58.811122 |
| H | 24.179910 | -40.890156 | -60.463888 |
| H | 22.018236 | -38.791036 | -59.918307 |
| H | 22.925429 | -39.069253 | -61.407286 |
| H | 25.756811 | -44.882366 | -59.421353 |
| H | 21.790312 | -45.469597 | -58.011894 |
| H | 21.409899 | -41.103320 | -59.162656 |
| H | 21.824136 | -42.956152 | -57.837264 |

|   |           |            |            |
|---|-----------|------------|------------|
| H | 22.986999 | -45.244668 | -59.309999 |
| H | 21.661935 | -41.356544 | -60.899671 |
| C | 30.206954 | -27.056261 | -58.221095 |
| C | 31.051515 | -26.378153 | -59.299167 |
| O | 30.890885 | -26.645034 | -60.490074 |
| C | 28.736025 | -27.311967 | -58.561995 |
| C | 28.114748 | -28.380722 | -57.643009 |
| O | 28.886782 | -29.298277 | -57.194120 |
| O | 26.890627 | -28.285323 | -57.401829 |
| H | 28.666427 | -27.698734 | -59.583919 |
| H | 28.132177 | -26.402906 | -58.494723 |
| H | 30.321503 | -26.532123 | -57.265617 |
| H | 30.626729 | -28.055842 | -58.075283 |
| H | 31.841988 | -25.665811 | -58.987175 |
| C | 33.360110 | -39.662968 | -59.276001 |
| C | 34.284874 | -38.551967 | -59.789093 |
| O | 33.864054 | -37.685064 | -60.557980 |
| C | 32.184044 | -39.076044 | -58.491932 |
| C | 31.224922 | -40.139735 | -58.004201 |
| C | 30.666693 | -40.970323 | -59.146351 |
| N | 30.959900 | -42.277100 | -59.141080 |
| O | 29.991894 | -40.445813 | -60.031709 |
| H | 33.930293 | -40.374252 | -58.666856 |
| H | 32.985168 | -40.194576 | -60.159808 |
| H | 35.339485 | -38.534209 | -59.457087 |
| H | 32.547632 | -38.504177 | -57.630018 |
| H | 31.644808 | -38.374080 | -59.135700 |
| H | 30.373483 | -39.655865 | -57.516028 |
| H | 31.695985 | -40.776223 | -57.246135 |
| H | 31.424140 | -42.712502 | -58.358649 |
| H | 30.576576 | -42.869595 | -59.866440 |
| N | 31.861105 | -33.865085 | -54.797206 |
| C | 30.754773 | -34.809121 | -54.634170 |



|   |           |            |            |
|---|-----------|------------|------------|
| C | 30.847189 | -35.632044 | -53.351734 |
| O | 30.048608 | -36.547209 | -53.142521 |
| C | 32.921208 | -31.674958 | -54.669878 |
| C | 31.693002 | -32.568568 | -54.538562 |
| O | 30.608695 | -32.091460 | -54.197380 |
| C | 30.541056 | -35.686087 | -55.899593 |
| C | 29.611312 | -35.092943 | -56.980129 |
| O | 29.639573 | -35.556456 | -58.130197 |
| O | 28.804917 | -34.184583 | -56.555980 |
| C | 32.767867 | -30.847911 | -55.954267 |
| O | 32.682260 | -31.732331 | -57.054280 |
| H | 31.490537 | -35.940839 | -56.381021 |
| H | 30.074775 | -36.635963 | -55.611755 |
| H | 31.860196 | -30.235746 | -55.859756 |
| H | 33.627221 | -30.167716 | -56.059539 |
| H | 31.986983 | -31.412151 | -57.668680 |
| H | 33.836697 | -32.279582 | -54.687586 |
| H | 32.742244 | -34.187371 | -55.170841 |
| H | 29.842309 | -34.209634 | -54.562931 |
| H | 31.635520 | -35.378114 | -52.618744 |
| H | 32.961521 | -31.018606 | -53.796428 |
| C | 20.066126 | -31.360325 | -59.210127 |
| C | 21.173988 | -30.598108 | -59.932965 |
| O | 21.454994 | -30.848980 | -61.104092 |
| N | 21.790984 | -29.658996 | -59.210954 |
| C | 22.847919 | -28.811172 | -59.758974 |
| C | 22.427226 | -28.167922 | -61.088037 |
| O | 23.121863 | -28.287247 | -62.101886 |
| C | 20.566001 | -32.689634 | -58.598980 |
| C | 21.461694 | -33.428598 | -59.515084 |
| C | 22.816082 | -33.617700 | -59.501619 |
| N | 21.027501 | -33.951711 | -60.724670 |
| C | 22.088505 | -34.430986 | -61.402272 |

|   |           |            |            |
|---|-----------|------------|------------|
| N | 23.183149 | -34.243006 | -60.676083 |
| C | 24.174523 | -29.578159 | -59.887111 |
| C | 24.618680 | -30.154860 | -58.544686 |
| C | 25.654104 | -31.248410 | -58.671361 |
| O | 25.988028 | -31.667747 | -59.813438 |
| O | 26.100084 | -31.696320 | -57.568478 |
| H | 21.117472 | -32.453647 | -57.683489 |
| H | 19.702748 | -33.297323 | -58.300569 |
| H | 23.537679 | -33.383822 | -58.733619 |
| H | 22.065980 | -34.936254 | -62.354541 |
| H | 24.949624 | -28.918238 | -60.284179 |
| H | 24.042862 | -30.382515 | -60.609145 |
| H | 25.066187 | -29.388850 | -57.906135 |
| H | 23.781410 | -30.587796 | -57.983290 |
| H | 20.084129 | -33.894148 | -61.079218 |
| H | 19.254580 | -31.479175 | -59.935509 |
| H | 19.683395 | -30.807745 | -58.348072 |
| H | 21.628125 | -29.638004 | -58.203381 |
| H | 22.997811 | -27.995213 | -59.038657 |
| H | 21.472434 | -27.609253 | -61.093836 |
| C | 26.167962 | -27.319930 | -63.863087 |
| C | 26.355975 | -28.187684 | -65.123282 |
| O | 27.490548 | -28.430079 | -65.531597 |
| N | 25.270819 | -28.652017 | -65.739127 |
| C | 25.400055 | -29.535067 | -66.909759 |
| C | 26.543643 | -28.133324 | -62.613756 |
| C | 24.513256 | -30.793844 | -66.723643 |
| C | 24.543935 | -31.344695 | -65.323065 |
| C | 25.363311 | -32.227132 | -64.662934 |
| N | 23.611005 | -30.933582 | -64.376595 |
| C | 23.854796 | -31.526340 | -63.198538 |
| N | 24.914141 | -32.315571 | -63.356756 |
| H | 23.471263 | -30.558354 | -66.971739 |

|   |           |            |            |
|---|-----------|------------|------------|
| H | 24.833373 | -31.565143 | -67.431910 |
| H | 26.216884 | -32.801772 | -64.986633 |
| H | 23.262801 | -31.393320 | -62.302490 |
| H | 22.940284 | -30.168935 | -64.520308 |
| H | 25.335116 | -32.920112 | -62.591691 |
| H | 27.588025 | -28.449198 | -62.671107 |
| H | 25.912634 | -29.021749 | -62.508352 |
| H | 26.429055 | -27.529886 | -61.707683 |
| H | 25.144049 | -26.931635 | -63.796023 |
| H | 25.162755 | -28.998993 | -67.835640 |
| H | 26.862473 | -26.480633 | -63.959515 |
| H | 24.349053 | -28.333528 | -65.471840 |
| H | 26.450821 | -29.822834 | -66.941367 |
| C | 25.287773 | -36.661930 | -66.406857 |
| C | 26.208145 | -37.841734 | -66.090158 |
| O | 25.791427 | -38.795410 | -65.435819 |
| N | 27.453132 | -37.786105 | -66.567316 |
| C | 28.319072 | -38.972995 | -66.568971 |
| C | 29.161104 | -39.119145 | -65.302966 |
| O | 29.793014 | -40.154018 | -65.087027 |
| N | 29.170018 | -38.084677 | -64.471888 |
| C | 29.793260 | -38.160230 | -63.151700 |
| C | 24.341039 | -36.375174 | -65.248602 |
| C | 24.956972 | -35.706753 | -64.017953 |
| O | 26.206367 | -35.476406 | -63.958476 |
| O | 24.129198 | -35.430974 | -63.104011 |
| C | 29.186816 | -37.106146 | -62.253303 |
| O | 29.318788 | -37.183713 | -61.025669 |
| C | 31.322581 | -38.038415 | -63.216904 |
| O | 28.584427 | -36.147889 | -62.889259 |
| H | 23.505144 | -35.743525 | -65.569386 |
| H | 23.910159 | -37.314194 | -64.884363 |
| H | 31.697210 | -38.807911 | -63.895513 |

|   |           |            |            |
|---|-----------|------------|------------|
| H | 31.624279 | -37.052428 | -63.588133 |
| H | 31.757185 | -38.201249 | -62.227273 |
| H | 24.739749 | -36.922481 | -67.321860 |
| H | 28.983645 | -38.927577 | -67.435501 |
| H | 25.872929 | -35.761263 | -66.621240 |
| H | 27.726093 | -36.986716 | -67.121127 |
| H | 27.697681 | -39.866466 | -66.648577 |
| H | 28.533177 | -37.310392 | -64.615271 |
| H | 29.538990 | -39.122090 | -62.698526 |
| C | 30.993853 | -30.837989 | -65.204792 |
| C | 29.950409 | -31.873163 | -64.754651 |
| C | 29.088882 | -31.322421 | -63.610264 |
| C | 28.336184 | -32.341112 | -62.773910 |
| O | 28.058932 | -33.474029 | -63.275273 |
| O | 28.006768 | -31.980121 | -61.597690 |
| H | 29.309076 | -32.171554 | -65.593034 |
| H | 30.452941 | -32.789553 | -64.418983 |
| H | 28.362505 | -30.594230 | -63.998879 |
| H | 29.710144 | -30.759581 | -62.910988 |
| H | 30.553326 | -29.885875 | -65.525933 |
| H | 31.616686 | -31.222395 | -66.020139 |
| H | 31.656587 | -30.596651 | -64.367611 |
| C | 36.822941 | -32.169976 | -62.941949 |
| C | 35.869616 | -32.931418 | -62.016344 |
| C | 34.923005 | -33.875953 | -62.765327 |
| C | 34.075746 | -34.766917 | -61.854419 |
| N | 33.174304 | -33.972172 | -61.024536 |
| C | 32.004787 | -34.413083 | -60.544653 |
| N | 31.649212 | -35.691554 | -60.688396 |
| N | 31.161649 | -33.545863 | -59.965260 |
| H | 35.291193 | -32.213348 | -61.426986 |
| H | 36.456747 | -33.513560 | -61.291676 |
| H | 34.260336 | -33.294561 | -63.421692 |

|   |           |            |            |
|---|-----------|------------|------------|
| H | 35.506441 | -34.538528 | -63.418710 |
| H | 34.722943 | -35.395904 | -61.230862 |
| H | 33.469209 | -35.444563 | -62.464005 |
| H | 33.455676 | -33.029296 | -60.723437 |
| H | 30.716771 | -36.006159 | -60.436616 |
| H | 32.350168 | -36.409826 | -60.830162 |
| H | 30.306950 | -33.871812 | -59.523371 |
| H | 31.438826 | -32.583154 | -59.825242 |
| H | 36.297429 | -31.688520 | -63.775842 |
| H | 37.583347 | -32.835159 | -63.369737 |
| H | 37.340347 | -31.385875 | -62.378974 |
| C | 21.430149 | -33.349682 | -50.364558 |
| C | 22.286365 | -32.076469 | -50.562889 |
| C | 22.999762 | -32.071247 | -51.920693 |
| N | 22.388084 | -31.439636 | -52.954544 |
| O | 24.099927 | -32.620650 | -52.043618 |
| H | 21.677433 | -31.173795 | -50.434790 |
| H | 23.087227 | -32.045385 | -49.819346 |
| H | 21.431662 | -31.121240 | -52.904020 |
| H | 22.805014 | -31.502500 | -53.884210 |
| H | 21.355080 | -33.672766 | -49.320729 |
| H | 21.883897 | -34.158296 | -50.944229 |
| H | 20.410069 | -33.207035 | -50.738855 |
| C | 22.949250 | -26.585002 | -52.987119 |
| C | 23.450031 | -27.918300 | -53.542829 |
| N | 23.564060 | -28.024373 | -55.043142 |
| H | 21.934607 | -26.353039 | -53.329583 |
| H | 23.612133 | -25.757949 | -53.265717 |
| H | 22.932571 | -26.646281 | -51.895113 |
| H | 22.797482 | -28.738650 | -53.233793 |
| H | 24.449234 | -28.135093 | -53.156952 |
| H | 24.540837 | -28.476186 | -55.255255 |
| H | 22.835224 | -28.668289 | -55.430217 |

|   |           |            |            |
|---|-----------|------------|------------|
| H | 23.515867 | -27.113985 | -55.504270 |
| C | 21.493918 | -36.937582 | -55.413941 |
| C | 22.661435 | -35.934528 | -55.451891 |
| C | 23.289823 | -35.862115 | -56.845963 |
| C | 22.223330 | -34.537854 | -54.990958 |
| H | 23.431483 | -36.287547 | -54.754425 |
| H | 23.574054 | -36.850016 | -57.210058 |
| H | 22.570996 | -35.443022 | -57.561832 |
| H | 24.188718 | -35.235045 | -56.849966 |
| H | 21.827071 | -34.557072 | -53.967117 |
| H | 21.432749 | -34.138347 | -55.642124 |
| H | 23.061078 | -33.832556 | -55.013907 |
| H | 20.906077 | -36.795945 | -54.498154 |
| H | 21.841901 | -37.976458 | -55.431489 |
| H | 20.820220 | -36.793447 | -56.270494 |
| C | 24.041019 | -36.051475 | -50.719057 |
| C | 23.149637 | -37.272334 | -50.955107 |
| O | 23.249234 | -37.933847 | -52.005526 |
| H | 23.648256 | -35.395058 | -49.938249 |
| H | 25.031118 | -36.404770 | -50.401110 |
| H | 24.166848 | -35.500957 | -51.655815 |
| H | 22.428176 | -37.570690 | -50.173357 |
| C | 34.536919 | -29.067067 | -58.887963 |
| C | 33.270480 | -29.081849 | -59.750772 |
| C | 33.145985 | -30.381215 | -60.529102 |
| N | 32.528480 | -30.334904 | -61.721584 |
| O | 33.599720 | -31.435891 | -60.049804 |
| H | 33.206482 | -28.222908 | -60.425355 |
| H | 32.384726 | -29.049599 | -59.104723 |
| H | 31.984524 | -29.521546 | -62.049653 |
| H | 32.364281 | -31.215481 | -62.193450 |
| H | 34.513862 | -28.256699 | -58.151728 |
| H | 35.440324 | -28.949618 | -59.495860 |

|   |           |            |            |
|---|-----------|------------|------------|
| H | 34.600071 | -30.023896 | -58.363252 |
| C | 23.583066 | -48.236060 | -60.183056 |
| C | 24.553046 | -47.107097 | -60.534906 |
| N | 24.365938 | -46.509907 | -61.704121 |
| O | 25.468004 | -46.792577 | -59.766771 |
| H | 24.128432 | -49.014224 | -59.646097 |
| H | 22.811298 | -47.839017 | -59.513632 |
| H | 23.093884 | -48.667349 | -61.061081 |
| H | 23.516445 | -46.659831 | -62.229922 |
| H | 24.828656 | -45.621726 | -61.862812 |
| C | 28.923577 | -45.922965 | -62.050082 |
| C | 29.571381 | -44.560525 | -61.826481 |
| O | 29.149918 | -43.784058 | -60.961076 |
| N | 30.618866 | -44.279797 | -62.579226 |
| H | 28.991869 | -46.500747 | -61.123222 |
| H | 27.861265 | -45.749902 | -62.246915 |
| H | 29.370950 | -46.491779 | -62.869042 |
| H | 30.803007 | -44.811221 | -63.418263 |
| H | 30.933732 | -43.316000 | -62.587734 |
| C | 27.711410 | -46.613872 | -65.570589 |
| C | 27.047272 | -45.250011 | -65.760805 |
| C | 27.635919 | -43.947814 | -65.187555 |
| C | 28.852992 | -43.482374 | -65.973515 |
| C | 26.552421 | -42.874424 | -65.155665 |
| H | 28.742795 | -46.635469 | -65.948663 |
| H | 27.147975 | -47.382324 | -66.111096 |
| H | 27.738513 | -46.902721 | -64.514247 |
| H | 26.901925 | -45.088661 | -66.841408 |
| H | 26.028414 | -45.344521 | -65.356531 |
| H | 27.931323 | -44.126680 | -64.144734 |
| H | 29.662272 | -44.226486 | -65.951425 |
| H | 29.246661 | -42.534253 | -65.590333 |
| H | 28.589753 | -43.327519 | -67.029663 |

|    |           |            |            |
|----|-----------|------------|------------|
| H  | 26.919919 | -41.951917 | -64.690765 |
| H  | 25.678557 | -43.204724 | -64.591019 |
| H  | 26.223758 | -42.629525 | -66.175876 |
| C  | 22.389562 | -43.960227 | -65.587867 |
| C  | 21.210067 | -44.727983 | -65.001096 |
| O  | 20.511098 | -45.449933 | -65.727992 |
| C  | 22.032116 | -42.468822 | -65.752996 |
| C  | 23.092196 | -41.761950 | -66.600954 |
| C  | 20.673111 | -42.314037 | -66.405030 |
| N  | 20.993082 | -44.580032 | -63.696875 |
| C  | 19.982017 | -45.351955 | -62.985035 |
| C  | 20.003989 | -44.998992 | -61.490025 |
| H  | 22.584197 | -44.408105 | -66.566602 |
| H  | 18.997533 | -45.146222 | -63.420631 |
| H  | 23.278880 | -44.044648 | -64.958217 |
| H  | 22.022756 | -42.015264 | -64.756594 |
| H  | 24.084678 | -41.839444 | -66.146402 |
| H  | 22.860518 | -40.694910 | -66.713610 |
| H  | 23.142225 | -42.202447 | -67.605428 |
| H  | 19.865204 | -42.723396 | -65.789791 |
| H  | 20.637835 | -42.837345 | -67.368584 |
| H  | 20.445928 | -41.255594 | -66.589579 |
| H  | 21.650402 | -44.012593 | -63.169594 |
| H  | 20.166023 | -46.424148 | -63.134876 |
| H  | 20.992376 | -45.191236 | -61.058731 |
| H  | 19.262816 | -45.592359 | -60.944962 |
| H  | 19.774882 | -43.938169 | -61.336160 |
| Cl | 21.364618 | -29.922573 | -56.087811 |
| O  | 25.388072 | -37.648062 | -53.881705 |
| O  | 30.661908 | -28.422511 | -62.544653 |
| O  | 30.167411 | -27.510648 | -65.224850 |
| O  | 27.338178 | -35.940360 | -54.494212 |
| O  | 25.825020 | -29.267803 | -55.149866 |



|   |           |            |            |
|---|-----------|------------|------------|
| O | 24.820956 | -31.790678 | -54.694118 |
| O | 30.488148 | -30.848674 | -58.623521 |
| O | 28.765184 | -38.590443 | -58.026179 |
| O | 26.698041 | -36.762222 | -57.038833 |
| O | 24.876714 | -38.848510 | -56.340172 |
| O | 27.514097 | -41.543092 | -61.244242 |
| O | 27.181125 | -39.131623 | -59.979974 |
| O | 28.250995 | -31.657218 | -56.115256 |
| O | 22.494046 | -28.408678 | -64.720627 |
| O | 29.094743 | -29.619168 | -60.721658 |
| O | 26.582278 | -38.743843 | -62.469459 |
| O | 23.864353 | -42.579450 | -63.066556 |
| O | 24.307511 | -39.881991 | -63.292257 |
| O | 26.053672 | -43.964295 | -62.022768 |
| H | 28.153878 | -38.869794 | -57.321198 |
| H | 28.393870 | -30.735481 | -56.492965 |
| H | 29.024348 | -31.903791 | -55.567720 |
| H | 24.684982 | -38.760489 | -57.298684 |
| H | 25.677307 | -39.419060 | -56.278647 |
| H | 26.595769 | -36.495042 | -54.125279 |
| H | 28.154256 | -36.231171 | -54.047937 |
| H | 26.341417 | -29.122441 | -55.984823 |
| H | 25.594272 | -30.230817 | -55.064764 |
| H | 24.872320 | -32.123973 | -53.773084 |
| H | 25.314091 | -32.457861 | -55.233939 |
| H | 30.021135 | -30.175566 | -58.052684 |
| H | 29.788347 | -31.554128 | -58.687329 |
| H | 28.469604 | -41.701229 | -61.178426 |
| H | 27.403948 | -40.680215 | -60.755603 |
| H | 26.325007 | -39.318647 | -59.566053 |
| H | 26.774729 | -34.353788 | -55.439810 |
| H | 22.638067 | -28.162339 | -63.774218 |
| H | 21.638984 | -28.034013 | -64.978881 |

|   |           |            |            |
|---|-----------|------------|------------|
| H | 28.428807 | -39.131740 | -58.808033 |
| H | 25.959342 | -37.356976 | -56.797685 |
| H | 27.040046 | -36.415807 | -56.184911 |
| H | 24.651386 | -37.686293 | -53.240789 |
| H | 25.031952 | -37.993611 | -54.728007 |
| H | 30.821876 | -27.564781 | -62.113229 |
| H | 29.990968 | -28.841717 | -61.940449 |
| H | 29.228811 | -27.734097 | -65.353015 |
| H | 30.358661 | -27.871390 | -64.338597 |
| H | 29.709962 | -30.009833 | -60.059662 |
| H | 28.547467 | -30.381860 | -61.005330 |
| H | 26.326414 | -37.810220 | -62.382950 |
| H | 26.850750 | -38.959278 | -61.511751 |
| H | 23.543919 | -42.719805 | -62.151773 |
| H | 24.072234 | -41.610267 | -63.152156 |
| H | 24.492135 | -39.699173 | -64.230715 |
| H | 25.167282 | -39.559894 | -62.886120 |
| H | 26.649856 | -43.254844 | -61.696982 |
| H | 25.358112 | -43.453142 | -62.497464 |

**A structure with the angle O6\*...Ca...O–D1-Glu189 fixed at approximately 140°**

B3LYP-D3(BJ)/BS1: -10463.2873766 a.u.

Grimme-D3(BJ): -0.9900846814 a.u.

IEFPCM-B3LYP\*/BS2: -10461.8278085 a.u.

|    |           |            |            |
|----|-----------|------------|------------|
| Ca | 27.891492 | -36.497677 | -59.151455 |
| Mn | 27.429410 | -33.059305 | -57.346837 |
| Mn | 27.269329 | -33.159546 | -60.084211 |
| Mn | 27.256958 | -34.997249 | -62.182077 |
| Mn | 24.828438 | -35.487305 | -60.956355 |
| O  | 26.427715 | -36.302832 | -61.277589 |
| O  | 28.259141 | -34.520059 | -60.762584 |
| O  | 25.908609 | -33.927811 | -61.434812 |
| O  | 28.394872 | -32.476257 | -58.890408 |

|   |           |            |            |
|---|-----------|------------|------------|
| O | 26.691707 | -34.118299 | -58.654762 |
| O | 26.371538 | -33.630076 | -55.993773 |
| C | 32.871406 | -41.754037 | -53.560295 |
| C | 31.549387 | -41.348301 | -52.889734 |
| C | 30.413705 | -40.999969 | -53.833875 |
| C | 30.034757 | -41.855454 | -54.877290 |
| C | 29.648027 | -39.840937 | -53.642632 |
| C | 28.930618 | -41.586719 | -55.682742 |
| C | 28.526811 | -39.561086 | -54.424169 |
| C | 28.147553 | -40.446156 | -55.441359 |
| O | 27.036394 | -40.182046 | -56.172060 |
| H | 31.735191 | -40.488195 | -52.234094 |
| H | 31.231816 | -42.165227 | -52.224360 |
| H | 30.601569 | -42.766688 | -55.059092 |
| H | 29.920113 | -39.142602 | -52.855231 |
| H | 28.653384 | -42.259733 | -56.485820 |
| H | 27.919135 | -38.681580 | -54.232575 |
| H | 26.864883 | -40.926838 | -56.849743 |
| H | 33.646656 | -41.940360 | -52.807442 |
| H | 33.224867 | -40.953291 | -54.221049 |
| H | 32.769806 | -42.661895 | -54.164947 |
| N | 22.229787 | -43.493153 | -58.589783 |
| C | 22.644761 | -44.870115 | -58.346945 |
| C | 22.140149 | -41.425597 | -59.917010 |
| C | 22.529024 | -42.903699 | -59.745236 |
| O | 23.081266 | -43.510889 | -60.666924 |
| C | 23.782064 | -45.034061 | -57.318457 |
| C | 24.905689 | -44.090861 | -57.549782 |
| C | 25.235363 | -42.938335 | -56.882177 |
| N | 25.772903 | -44.149011 | -58.626663 |
| C | 26.576491 | -43.053591 | -58.572229 |
| N | 26.271167 | -42.304755 | -57.523002 |
| C | 23.370619 | -40.500230 | -59.968261 |

|   |           |            |            |
|---|-----------|------------|------------|
| C | 23.015118 | -39.103155 | -60.527184 |
| C | 23.461598 | -37.975408 | -59.614400 |
| O | 23.450211 | -38.169138 | -58.390808 |
| O | 23.731645 | -36.831337 | -60.173319 |
| H | 24.116753 | -46.077667 | -57.370954 |
| H | 23.398832 | -44.864344 | -56.305171 |
| H | 24.796017 | -42.530272 | -55.981717 |
| H | 27.363046 | -42.844215 | -59.281744 |
| H | 23.806684 | -40.405321 | -58.971838 |
| H | 24.127158 | -40.961943 | -60.608561 |
| H | 21.922062 | -38.993764 | -60.600976 |
| H | 23.406515 | -38.963255 | -61.534193 |
| H | 25.808392 | -44.915606 | -59.305137 |
| H | 21.790308 | -45.469621 | -58.011922 |
| H | 21.409874 | -41.103247 | -59.162722 |
| H | 21.824081 | -42.956159 | -57.837290 |
| H | 22.986989 | -45.244654 | -59.310008 |
| H | 21.662055 | -41.356468 | -60.899680 |
| C | 30.206949 | -27.056298 | -58.221100 |
| C | 31.051463 | -26.378182 | -59.299225 |
| O | 30.890851 | -26.645049 | -60.490011 |
| C | 28.737758 | -27.309617 | -58.568146 |
| C | 28.118338 | -28.383385 | -57.656572 |
| O | 28.902298 | -29.287921 | -57.199027 |
| O | 26.891810 | -28.306095 | -57.427757 |
| H | 28.670251 | -27.691071 | -59.592234 |
| H | 28.132743 | -26.401507 | -58.497999 |
| H | 30.321500 | -26.532135 | -57.265615 |
| H | 30.626759 | -28.055845 | -58.075306 |
| H | 31.841992 | -25.665809 | -58.987180 |
| C | 33.360147 | -39.662948 | -59.276022 |
| C | 34.284784 | -38.551962 | -59.789129 |
| O | 33.864114 | -37.685064 | -60.557922 |

|   |           |            |            |
|---|-----------|------------|------------|
| C | 32.184061 | -39.076042 | -58.491921 |
| C | 31.225082 | -40.139745 | -58.004232 |
| C | 30.666610 | -40.970395 | -59.146383 |
| N | 30.959798 | -42.277175 | -59.141046 |
| O | 29.991606 | -40.445316 | -60.031498 |
| H | 33.930288 | -40.374264 | -58.666861 |
| H | 32.985163 | -40.194566 | -60.159814 |
| H | 35.339488 | -38.534208 | -59.457093 |
| H | 32.547629 | -38.504201 | -57.630007 |
| H | 31.644800 | -38.374091 | -59.135686 |
| H | 30.373330 | -39.655934 | -57.516222 |
| H | 31.695941 | -40.776336 | -57.246193 |
| H | 31.424167 | -42.712482 | -58.358668 |
| H | 30.576558 | -42.869632 | -59.866441 |
| N | 31.861085 | -33.865155 | -54.797203 |
| C | 30.754819 | -34.809169 | -54.634228 |
| C | 30.847133 | -35.632107 | -53.351764 |
| O | 30.048666 | -36.547155 | -53.142523 |
| C | 32.921202 | -31.674966 | -54.669887 |
| C | 31.693012 | -32.568480 | -54.538543 |
| O | 30.608675 | -32.091461 | -54.197393 |
| C | 30.551573 | -35.664109 | -55.904107 |
| C | 29.722660 | -34.971070 | -56.997190 |
| O | 29.859568 | -35.314264 | -58.184175 |
| O | 28.861612 | -34.121814 | -56.563345 |
| C | 32.768443 | -30.847059 | -55.953768 |
| O | 32.683491 | -31.730197 | -57.055593 |
| H | 31.500954 | -35.982553 | -56.344831 |
| H | 30.001354 | -36.577784 | -55.650991 |
| H | 31.860543 | -30.235213 | -55.859291 |
| H | 33.627533 | -30.166430 | -56.058194 |
| H | 31.993379 | -31.405573 | -57.673366 |
| H | 33.836702 | -32.279580 | -54.687594 |

|   |           |            |            |
|---|-----------|------------|------------|
| H | 32.742255 | -34.187366 | -55.170829 |
| H | 29.842312 | -34.209635 | -54.562921 |
| H | 31.635510 | -35.378102 | -52.618729 |
| H | 32.961520 | -31.018611 | -53.796424 |
| C | 20.066148 | -31.360437 | -59.210071 |
| C | 21.173946 | -30.598156 | -59.932929 |
| O | 21.455008 | -30.848990 | -61.104135 |
| N | 21.790964 | -29.658972 | -59.210956 |
| C | 22.847899 | -28.811283 | -59.758961 |
| C | 22.427294 | -28.167960 | -61.088065 |
| O | 23.121802 | -28.287297 | -62.101818 |
| C | 20.593490 | -32.696944 | -58.634220 |
| C | 21.489240 | -33.423682 | -59.568294 |
| C | 22.841483 | -33.636059 | -59.552191 |
| N | 21.049111 | -33.964893 | -60.768042 |
| C | 22.104787 | -34.479544 | -61.432385 |
| N | 23.200796 | -34.294116 | -60.710227 |
| C | 24.173392 | -29.576235 | -59.886132 |
| C | 24.602325 | -30.163500 | -58.544562 |
| C | 25.638622 | -31.252662 | -58.674038 |
| O | 25.935958 | -31.701547 | -59.815233 |
| O | 26.119536 | -31.669337 | -57.574492 |
| H | 21.154796 | -32.471053 | -57.722210 |
| H | 19.744616 | -33.323217 | -58.332849 |
| H | 23.564495 | -33.409755 | -58.784181 |
| H | 22.069807 | -35.013148 | -62.368534 |
| H | 24.952822 | -28.912940 | -60.269249 |
| H | 24.047837 | -30.374620 | -60.615709 |
| H | 25.037958 | -29.404230 | -57.891051 |
| H | 23.759239 | -30.606745 | -57.999841 |
| H | 20.106364 | -33.903946 | -61.123415 |
| H | 19.254613 | -31.479205 | -59.935521 |
| H | 19.683405 | -30.807726 | -58.348072 |

|   |           |            |            |
|---|-----------|------------|------------|
| H | 21.628144 | -29.637953 | -58.203328 |
| H | 22.997810 | -27.995224 | -59.038660 |
| H | 21.472456 | -27.609213 | -61.093837 |
| C | 26.167959 | -27.319946 | -63.863110 |
| C | 26.356019 | -28.187614 | -65.123239 |
| O | 27.490567 | -28.430113 | -65.531590 |
| N | 25.270783 | -28.652050 | -65.739174 |
| C | 25.400060 | -29.535125 | -66.909651 |
| C | 26.542939 | -28.132845 | -62.613366 |
| C | 24.515888 | -30.797002 | -66.715474 |
| C | 24.541082 | -31.352988 | -65.313754 |
| C | 25.333480 | -32.266899 | -64.662259 |
| N | 23.613313 | -30.933549 | -64.364774 |
| C | 23.833558 | -31.550560 | -63.194979 |
| N | 24.872954 | -32.366598 | -63.359153 |
| H | 23.473437 | -30.564082 | -66.964519 |
| H | 24.836571 | -31.569771 | -67.421956 |
| H | 26.178191 | -32.853524 | -64.987208 |
| H | 23.240705 | -31.414480 | -62.299289 |
| H | 22.954734 | -30.156564 | -64.503818 |
| H | 25.279637 | -32.980218 | -62.594696 |
| H | 27.587264 | -28.448476 | -62.669767 |
| H | 25.911982 | -29.021236 | -62.507742 |
| H | 26.427395 | -27.528959 | -61.707736 |
| H | 25.144049 | -26.931636 | -63.796016 |
| H | 25.162727 | -28.999027 | -67.835620 |
| H | 26.862469 | -26.480631 | -63.959520 |
| H | 24.349043 | -28.333539 | -65.471825 |
| H | 26.450830 | -29.822847 | -66.941372 |
| C | 25.287787 | -36.661907 | -66.406837 |
| C | 26.207966 | -37.841745 | -66.090202 |
| O | 25.791614 | -38.795382 | -65.435605 |
| N | 27.453167 | -37.786145 | -66.567410 |

|   |           |            |            |
|---|-----------|------------|------------|
| C | 28.319067 | -38.972979 | -66.568966 |
| C | 29.161088 | -39.119203 | -65.302946 |
| O | 29.793025 | -40.154019 | -65.087038 |
| N | 29.169964 | -38.084647 | -64.471821 |
| C | 29.793337 | -38.160192 | -63.151753 |
| C | 24.328939 | -36.390447 | -65.249472 |
| C | 24.945529 | -35.830509 | -63.961533 |
| O | 26.169266 | -35.479923 | -63.939100 |
| O | 24.147397 | -35.743686 | -62.988480 |
| C | 29.178518 | -37.103160 | -62.255455 |
| O | 29.294339 | -37.198378 | -61.024349 |
| C | 31.322340 | -38.043025 | -63.212787 |
| O | 28.575042 | -36.157074 | -62.896148 |
| H | 23.547612 | -35.684946 | -65.557584 |
| H | 23.824822 | -37.317715 | -64.961609 |
| H | 31.699237 | -38.814400 | -63.887940 |
| H | 31.625286 | -37.057624 | -63.583144 |
| H | 31.751377 | -38.204131 | -62.220760 |
| H | 24.739748 | -36.922484 | -67.321863 |
| H | 28.983656 | -38.927558 | -67.435492 |
| H | 25.872933 | -35.761269 | -66.621245 |
| H | 27.726088 | -36.986720 | -67.121133 |
| H | 27.697691 | -39.866466 | -66.648588 |
| H | 28.533124 | -37.310411 | -64.615250 |
| H | 29.539055 | -39.122114 | -62.698470 |
| C | 30.993758 | -30.838021 | -65.204788 |
| C | 29.946059 | -31.873091 | -64.754771 |
| C | 29.083483 | -31.327805 | -63.607721 |
| C | 28.288608 | -32.340096 | -62.798334 |
| O | 28.005424 | -33.467607 | -63.302972 |
| O | 27.925468 | -31.971292 | -61.631564 |
| H | 29.303907 | -32.165837 | -65.594763 |
| H | 30.446292 | -32.792297 | -64.422905 |



|   |           |            |            |
|---|-----------|------------|------------|
| H | 28.382758 | -30.571240 | -63.989201 |
| H | 29.710533 | -30.797054 | -62.888442 |
| H | 30.553318 | -29.885880 | -65.525920 |
| H | 31.616688 | -31.222393 | -66.020130 |
| H | 31.656551 | -30.596670 | -64.367599 |
| C | 36.822943 | -32.169973 | -62.941950 |
| C | 35.873138 | -32.938470 | -62.025787 |
| C | 34.963878 | -33.904436 | -62.790683 |
| C | 34.107615 | -34.788537 | -61.886199 |
| N | 33.212226 | -33.977016 | -61.068361 |
| C | 32.025961 | -34.390032 | -60.612282 |
| N | 31.653954 | -35.665539 | -60.764461 |
| N | 31.179980 | -33.497290 | -60.075068 |
| H | 35.271591 | -32.225576 | -61.453873 |
| H | 36.457539 | -33.504096 | -61.286037 |
| H | 34.310448 | -33.339616 | -63.470177 |
| H | 35.574613 | -34.565656 | -63.419883 |
| H | 34.744909 | -35.418359 | -61.253663 |
| H | 33.497706 | -35.464534 | -62.494018 |
| H | 33.496109 | -33.033440 | -60.775338 |
| H | 30.727321 | -35.966791 | -60.485420 |
| H | 32.356092 | -36.392980 | -60.844668 |
| H | 30.378963 | -33.830170 | -59.543404 |
| H | 31.517457 | -32.562539 | -59.879216 |
| H | 36.297428 | -31.688518 | -63.775843 |
| H | 37.583339 | -32.835162 | -63.369736 |
| H | 37.340342 | -31.385880 | -62.378973 |
| C | 21.430180 | -33.349702 | -50.364597 |
| C | 22.286596 | -32.073883 | -50.548574 |
| C | 23.012795 | -32.047157 | -51.898962 |
| N | 22.389596 | -31.438781 | -52.940614 |
| O | 24.134149 | -32.554333 | -52.009829 |
| H | 21.674119 | -31.173923 | -50.417082 |

|   |           |            |            |
|---|-----------|------------|------------|
| H | 23.080899 | -32.047489 | -49.798000 |
| H | 21.419177 | -31.163870 | -52.901582 |
| H | 22.815112 | -31.499506 | -53.866669 |
| H | 21.355073 | -33.672750 | -49.320724 |
| H | 21.883882 | -34.158315 | -50.944219 |
| H | 20.410073 | -33.207026 | -50.738850 |
| C | 22.949253 | -26.585008 | -52.987136 |
| C | 23.450041 | -27.918303 | -53.542821 |
| N | 23.564090 | -28.024341 | -55.043112 |
| H | 21.934604 | -26.353037 | -53.329581 |
| H | 23.612130 | -25.757946 | -53.265714 |
| H | 22.932568 | -26.646282 | -51.895110 |
| H | 22.797480 | -28.738646 | -53.233796 |
| H | 24.449232 | -28.135097 | -53.156952 |
| H | 24.540801 | -28.476377 | -55.255282 |
| H | 22.835209 | -28.668270 | -55.430286 |
| H | 23.515871 | -27.113968 | -55.504245 |
| C | 21.494369 | -36.937755 | -55.414324 |
| C | 22.661253 | -35.916945 | -55.348108 |
| C | 23.076855 | -35.378463 | -56.717950 |
| C | 22.315648 | -34.742289 | -54.419518 |
| H | 23.525216 | -36.423701 | -54.905473 |
| H | 23.310986 | -36.179432 | -57.421282 |
| H | 22.252418 | -34.791613 | -57.143578 |
| H | 23.954521 | -34.726226 | -56.629075 |
| H | 22.085593 | -35.091026 | -53.403377 |
| H | 21.439202 | -34.191221 | -54.788396 |
| H | 23.148269 | -34.034079 | -54.354872 |
| H | 20.906373 | -36.795696 | -54.498198 |
| H | 21.841742 | -37.976599 | -55.431360 |
| H | 20.820103 | -36.793402 | -56.270395 |
| C | 24.041010 | -36.051517 | -50.719057 |
| C | 23.149746 | -37.272359 | -50.955235 |

|   |           |            |            |
|---|-----------|------------|------------|
| O | 23.248972 | -37.933680 | -52.005638 |
| H | 23.648278 | -35.395073 | -49.938221 |
| H | 25.031130 | -36.404766 | -50.401146 |
| H | 24.166812 | -35.500933 | -51.655802 |
| H | 22.428229 | -37.570731 | -50.173329 |
| C | 34.536903 | -29.067081 | -58.887969 |
| C | 33.270081 | -29.078370 | -59.750672 |
| C | 33.139427 | -30.371511 | -60.538309 |
| N | 32.517126 | -30.313954 | -61.727644 |
| O | 33.590085 | -31.433282 | -60.070170 |
| H | 33.206537 | -28.215300 | -60.420051 |
| H | 32.384732 | -29.048632 | -59.104012 |
| H | 31.966594 | -29.500720 | -62.045264 |
| H | 32.341976 | -31.191954 | -62.200452 |
| H | 34.513859 | -28.256699 | -58.151732 |
| H | 35.440319 | -28.949615 | -59.495866 |
| H | 34.600079 | -30.023896 | -58.363251 |
| C | 23.583103 | -48.236074 | -60.183071 |
| C | 24.553069 | -47.107129 | -60.534866 |
| N | 24.365904 | -46.509874 | -61.704175 |
| O | 25.468005 | -46.792460 | -59.766608 |
| H | 24.128437 | -49.014225 | -59.646092 |
| H | 22.811300 | -47.839018 | -59.513650 |
| H | 23.093900 | -48.667365 | -61.061089 |
| H | 23.516442 | -46.659849 | -62.229915 |
| H | 24.828677 | -45.621688 | -61.862805 |
| C | 28.923569 | -45.922954 | -62.050071 |
| C | 29.571280 | -44.560565 | -61.826419 |
| O | 29.149932 | -43.784047 | -60.961077 |
| N | 30.618955 | -44.279768 | -62.579289 |
| H | 28.991875 | -46.500745 | -61.123224 |
| H | 27.861271 | -45.749900 | -62.246921 |
| H | 29.370955 | -46.491781 | -62.869043 |

|   |           |            |            |
|---|-----------|------------|------------|
| H | 30.803002 | -44.811225 | -63.418259 |
| H | 30.933729 | -43.316000 | -62.587731 |
| C | 27.711430 | -46.613863 | -65.570581 |
| C | 27.047236 | -45.250013 | -65.760815 |
| C | 27.635926 | -43.947839 | -65.187546 |
| C | 28.853008 | -43.482373 | -65.973524 |
| C | 26.552431 | -42.874419 | -65.155654 |
| H | 28.742795 | -46.635473 | -65.948665 |
| H | 27.147973 | -47.382324 | -66.111099 |
| H | 27.738514 | -46.902723 | -64.514248 |
| H | 26.901922 | -45.088659 | -66.841406 |
| H | 26.028418 | -45.344521 | -65.356530 |
| H | 27.931337 | -44.126679 | -64.144736 |
| H | 29.662269 | -44.226486 | -65.951428 |
| H | 29.246657 | -42.534252 | -65.590336 |
| H | 28.589750 | -43.327520 | -67.029666 |
| H | 26.919938 | -41.951930 | -64.690751 |
| H | 25.678613 | -43.204723 | -64.590975 |
| H | 26.223752 | -42.629516 | -66.175857 |
| C | 22.389567 | -43.960173 | -65.587858 |
| C | 21.210092 | -44.728013 | -65.001210 |
| O | 20.511110 | -45.449928 | -65.727956 |
| C | 22.032135 | -42.468816 | -65.753002 |
| C | 23.092206 | -41.761947 | -66.600948 |
| C | 20.673082 | -42.314027 | -66.405043 |
| N | 20.993079 | -44.580016 | -63.696793 |
| C | 19.982013 | -45.351946 | -62.985015 |
| C | 20.003989 | -44.998995 | -61.490040 |
| H | 22.584202 | -44.408108 | -66.566580 |
| H | 18.997530 | -45.146222 | -63.420634 |
| H | 23.278939 | -44.044532 | -64.958133 |
| H | 22.022758 | -42.015257 | -64.756591 |
| H | 24.084672 | -41.839441 | -66.146399 |

|    |           |            |            |
|----|-----------|------------|------------|
| H  | 22.860513 | -40.694913 | -66.713612 |
| H  | 23.142223 | -42.202451 | -67.605428 |
| H  | 19.865206 | -42.723395 | -65.789788 |
| H  | 20.637838 | -42.837349 | -67.368580 |
| H  | 20.445931 | -41.255597 | -66.589576 |
| H  | 21.650392 | -44.012592 | -63.169596 |
| H  | 20.166023 | -46.424148 | -63.134880 |
| H  | 20.992376 | -45.191234 | -61.058733 |
| H  | 19.262818 | -45.592359 | -60.944962 |
| H  | 19.774881 | -43.938169 | -61.336160 |
| Cl | 21.362273 | -29.912804 | -56.094403 |
| O  | 25.526723 | -37.383781 | -53.606152 |
| O  | 30.625811 | -28.422221 | -62.542823 |
| O  | 30.170148 | -27.516985 | -65.231273 |
| O  | 27.386093 | -35.578478 | -54.171039 |
| O  | 25.832122 | -29.255382 | -55.153708 |
| O  | 24.826159 | -31.759563 | -54.673304 |
| O  | 30.501435 | -30.842813 | -58.640829 |
| O  | 28.984879 | -38.224213 | -57.780457 |
| O  | 27.196319 | -36.593933 | -56.708708 |
| O  | 25.111850 | -38.245539 | -56.143160 |
| O  | 27.613537 | -40.179772 | -58.903210 |
| O  | 26.189345 | -38.020395 | -59.145388 |
| O  | 28.282810 | -31.616182 | -56.133690 |
| O  | 22.497843 | -28.409913 | -64.715146 |
| O  | 29.060196 | -29.634266 | -60.728787 |
| O  | 26.219165 | -38.983512 | -61.612645 |
| O  | 24.072129 | -42.697717 | -63.016994 |
| O  | 24.391641 | -40.026177 | -63.315344 |
| O  | 26.109867 | -44.210592 | -62.066540 |
| H  | 28.417365 | -37.963787 | -57.026931 |
| H  | 28.424053 | -30.688417 | -56.507547 |
| H  | 29.047456 | -31.865941 | -55.574804 |

|   |           |            |            |
|---|-----------|------------|------------|
| H | 24.414480 | -38.289823 | -56.829994 |
| H | 25.694093 | -39.038947 | -56.211061 |
| H | 26.629141 | -36.138133 | -53.838452 |
| H | 28.192533 | -36.001818 | -53.823037 |
| H | 26.341528 | -29.124975 | -55.994439 |
| H | 25.599351 | -30.217239 | -55.052583 |
| H | 24.896983 | -32.082265 | -53.749569 |
| H | 25.318198 | -32.422763 | -55.219307 |
| H | 30.031398 | -30.175353 | -58.067395 |
| H | 29.804057 | -31.548301 | -58.716737 |
| H | 28.141919 | -40.215033 | -59.720063 |
| H | 26.937224 | -39.436872 | -59.018167 |
| H | 25.418963 | -38.038285 | -58.572415 |
| H | 26.871126 | -34.161495 | -55.335782 |
| H | 22.639476 | -28.159654 | -63.768924 |
| H | 21.634495 | -28.053276 | -64.971478 |
| H | 28.552478 | -39.065620 | -58.124080 |
| H | 26.355214 | -37.106636 | -56.622740 |
| H | 27.287646 | -36.116208 | -55.852613 |
| H | 24.746324 | -37.521053 | -53.034378 |
| H | 25.252009 | -37.709502 | -54.494061 |
| H | 30.776521 | -27.568480 | -62.100050 |
| H | 29.954900 | -28.854602 | -61.948148 |
| H | 29.230647 | -27.735461 | -65.361245 |
| H | 30.353931 | -27.871921 | -64.341009 |
| H | 29.684288 | -30.020437 | -60.073423 |
| H | 28.511461 | -30.397687 | -61.009195 |
| H | 26.327714 | -38.090921 | -61.984765 |
| H | 26.065971 | -38.727776 | -60.647644 |
| H | 23.628401 | -42.802487 | -62.148086 |
| H | 24.194724 | -41.721329 | -63.166854 |
| H | 24.763906 | -39.730693 | -64.165599 |
| H | 25.066359 | -39.724187 | -62.647038 |

H 26.816404 -43.752964 -61.583451

H 25.503817 -43.515811 -62.433989
